# Supplementary material
Source: ML conference proceedings conference paper supplement (https://proceedings.neurips.cc/paper_files/paper/2016/hash/0deb1c54814305ca9ad266f53bc82511-Abstract.html)
Supplement: Supplementary file [file 0deb1c54814305ca9ad266f53bc82511-Supplemental.zip]

---

# Single-Image Depth Perception in the Wild

## Supplementary Material

---

**Weifeng Chen   Zhao Fu   Dawei Yang   Jia Deng**  
University of Michigan, Ann Arbor  
{wfchen,zhaofu,ydawei,jiadeng}@umich.edu

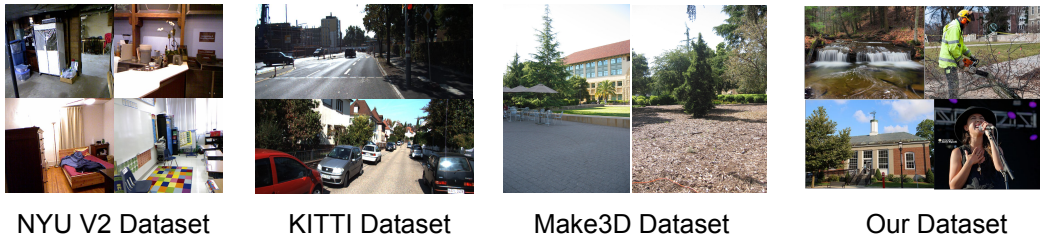

Figure 1: Additional example images from current RGB-D datasets and our Depth in the Wild (DIW) dataset.

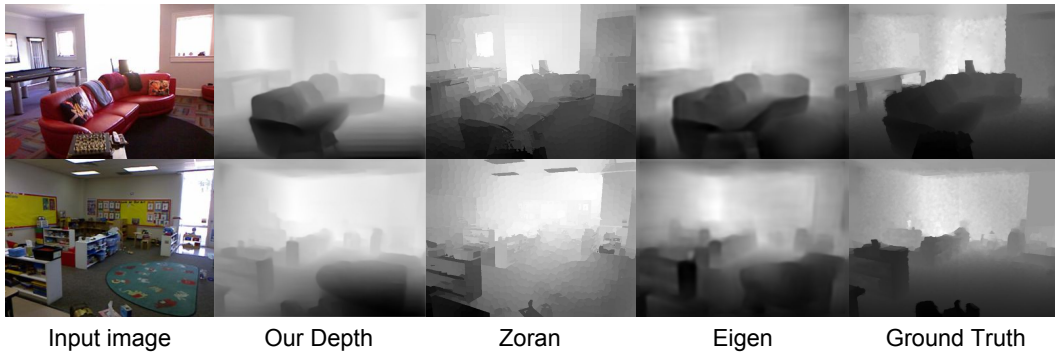

Figure 2: Additional qualitative results on NYU Depth by our method, the method of Eigen et al. [1], and the method of Zoran et al. [2]. All depth maps except ours are directly from [2].

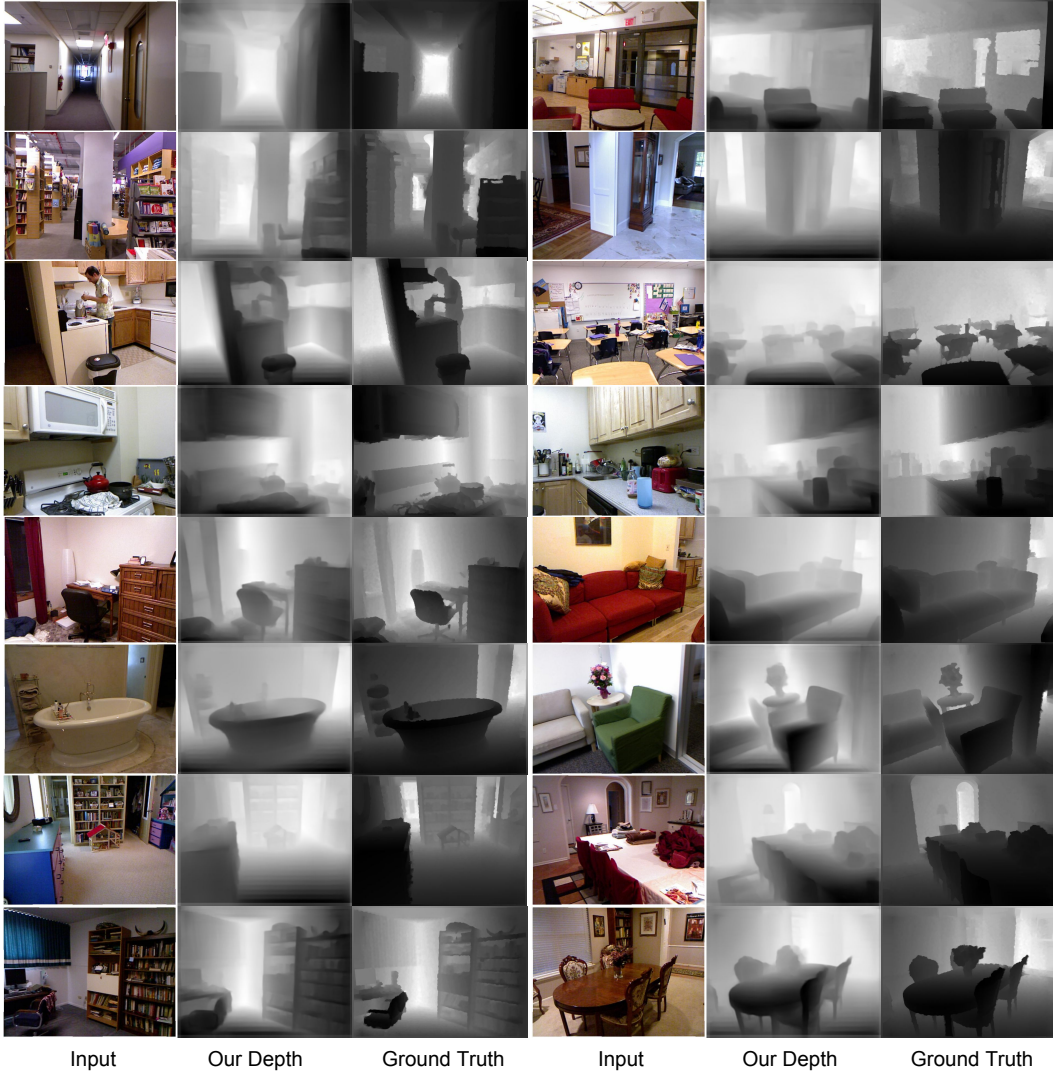

Figure 3: Additional qualitative results on NYU Depth test set by our method. Here we show the original input images and the depth maps by our method, as well as the ground truth.

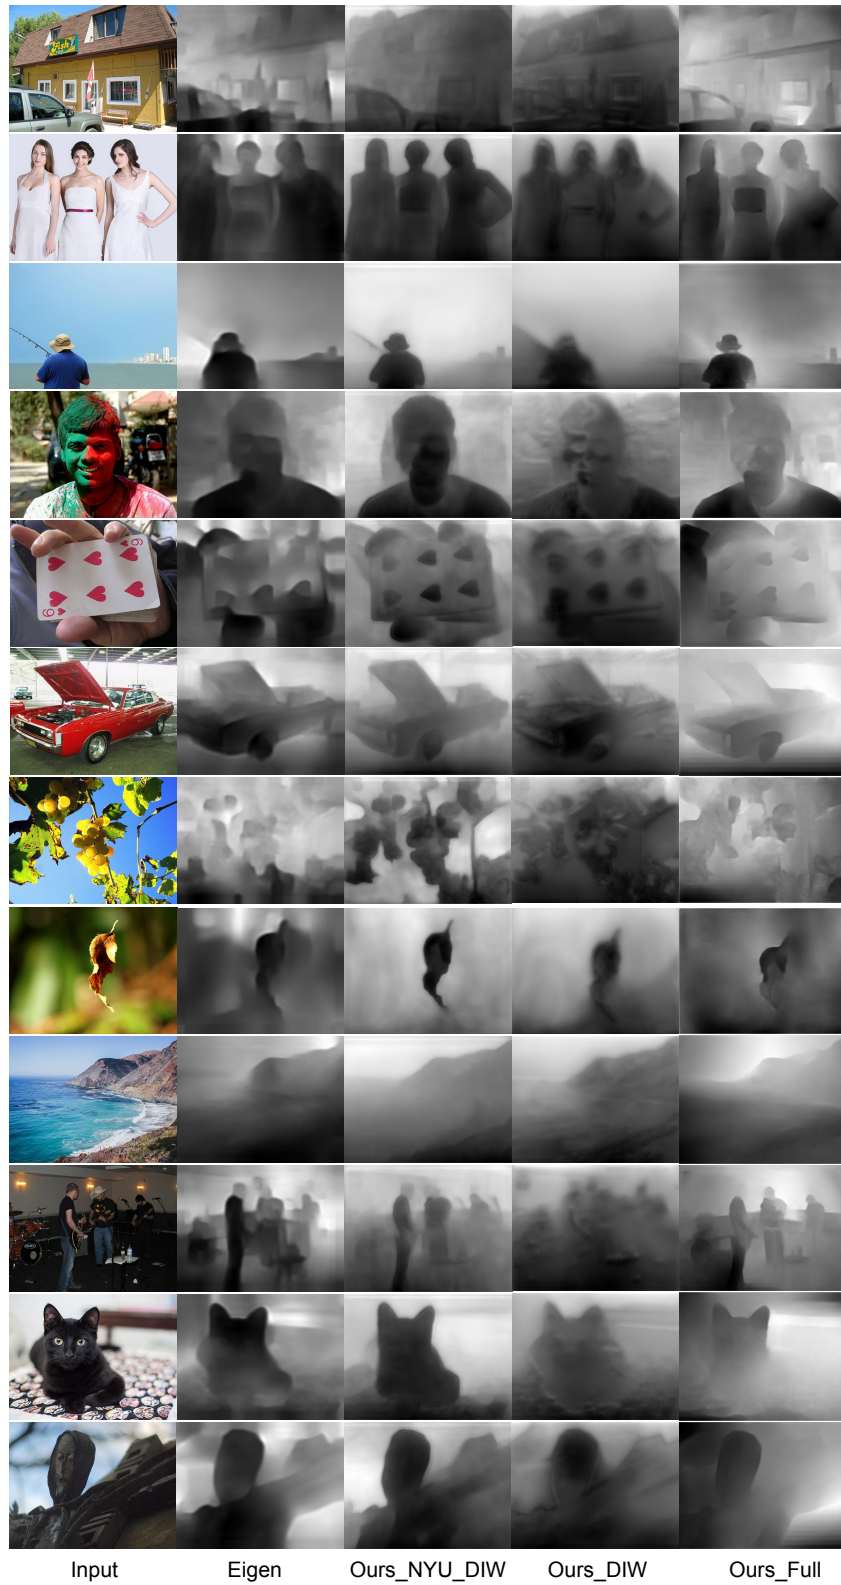

Figure 4: Additional qualitative results on our Depth in the Wild (DIW) dataset by our method and the method of Eigen et al. [1].

| Method       | RMSE        | RMSE<br>(log) | RMSE<br>(s.inv) | absrel      | sqrrel      |
|--------------|-------------|---------------|-----------------|-------------|-------------|
| Ours         | 0.89        | 0.32          | 0.25            | 0.27        | 0.29        |
| Ours_Full    | 0.74        | 0.26          | 0.21            | 0.21        | 0.19        |
| Eigen(V) [1] | <b>0.64</b> | <b>0.21</b>   | <b>0.17</b>     | <b>0.16</b> | <b>0.12</b> |

Table 1: Table 2 of the main paper reports the metric error of our network trained on relative depth pairs. Here we provide additional results by training our network on the full depth map. The network **Ours** is our network trained on the 795 NYU Depth training subset, and **Ours\_Full** is our network trained on the full NYU Depth training set.

| Method   | WKDR         | WKDR <sup>=</sup> | WKDR <sup>≠</sup> |
|----------|--------------|-------------------|-------------------|
| rand_48K | <b>34.3%</b> | <b>31.7%</b>      | <b>37.1%</b>      |
| rand_24K | 34.5%        | 32.6%             | 36.9%             |
| rand_12K | 34.9%        | 32.4%             | 37.6%             |
| rand_6K  | 36.1%        | 32.2%             | 39.9%             |
| rand_3K  | 35.8%        | 28.7%             | 41.3%             |

Table 2: Table 2 of the main paper reports the performance of our network versus the number of randomly sampled non-superpixel point pairs on NYU Depth. Here we report additional results by sampling more pairs. **rand\_N** denotes a network trained with  $N$  pairs per image.

| #Depth Pairs | WKDR         | WKDR <sup>=</sup> | WKDR <sup>≠</sup> |
|--------------|--------------|-------------------|-------------------|
| 800          | <b>35.6%</b> | <b>36.1%</b>      | <b>36.5%</b>      |
| 500          | 37.2%        | 37.7%             | 38.2%             |
| 250          | 38.0%        | 37.4%             | 39.7%             |
| 100          | 42.3%        | 41.1%             | 44.0%             |

Table 3: Table 2 of the main paper reports the performance of our network trained on 800 superpixel point pairs. Here we report additional results by decreasing the number of point pairs.

## References

- [1] D. Eigen and R. Fergus, “Predicting depth, surface normals and semantic labels with a common multi-scale convolutional architecture,” in *ICCV*, 2015.
- [2] D. Zoran, P. Isola, D. Krishnan, and W. T. Freeman, “Learning ordinal relationships for mid-level vision,” in *ICCV*, 2015.
- [3] K. Simonyan and A. Zisserman, “Very deep convolutional networks for large-scale image recognition,” *arXiv preprint arXiv:1409.1556*, 2014.
